# Supplementary material for: The adaptive value of habitat preferences from a multi-scale spatial perspective: insights from marsh-nesting avian species
Source: PeerJ. 2017 Mar 28;5:e3164. doi: 10.7717/peerj.3164 (PMC5372843; doi:10.7717/peerj.3164)
Supplement: Data S1 — Nest survival and habitat parameters database. Nest coordinates were not included for conservation reasons. [file peerj-05-3164-s003.xlsx]

## Sheet: little crake
Fixed factors							Nest factors					Territory factors						Landscape factors
Nest	XCOORD	YCOORD	Survival rate (days)	Nest fate	Initiation day	Year	Plant species	Vegetation stage	Vegetation cover (%)	Vegetation height (cm)	Water depth (cm)	Reed cover (%)	Sedges cover (%)	Willow cover (%)	Open water (%)	Vegetation density (%)	Water depth (cm)	Arable land (%)	Urbanised area (%)	Emergent vegetation (%)	Woody vegetation (%)	Water body shape (m/ha)	Water body fragmentation (ha/m)
GZ8	542166.23391	5964914.709577	10.5	0	59	1	0	2	50	102.3	38.7	0	0	0	6.3	21	36	0	0	43.47	0	359.8	0.448
GZ10	542854.735364	5962976.874745	23	1	6	1	0	2	25	65.9	79.6	0	0	0	52.6	23.5	89.3	0	0	10.75	1.35	456.2	0.101
GZ11	543033.467769	5962797.790235	23	1	14	1	0	2	45	98.5	62.5	5.6	13.5	0	23.6	40.8	61.6	0	0	18.71	1.43	332.6	0.078
GZ12	548038.352699	5969249.278539	11	0	12	1	2	2	80	102.4	17.6	0	0	0	0	19	29.9	50.4	0	14.41	5.49	405.6	0.158
GZ16	542938.912585	5962907.934737	23	1	31	1	0	2	35	111.4	38.6	0	0	0	22.7	27	28.8	0	0	16.33	1.91	344.7	0.085
GZ17	543102.372087	5962892.136987	23	1	15	1	0	2	45	100	63	0	0	0	62.2	31.3	64.9	0	0	20.14	0.64	368.7	0.117
GZ20	543005.2006	5962989.566076	23	1	40	1	0	2	60	91	79.1	0	0	0	44.6	32	49	0	0	17.04	1.11	399.8	0.117
GZ23	542934.378664	5962880.69243	23	1	33	1	0	2	45	103	40.5	0	0	0	2.4	30.3	48	0	0	16.64	1.91	345.4	0.085
GZ25	542839.487083	5962986.144276	23	1	46	1	0	2	45	113.7	45.3	0	0	0	59.6	23	54.3	0	0	9.64	1.35	493.1	0.101
GZ26	543050.746601	5962921.65626	23	1	52	1	0	2	60	123	69.9	0	0	0	33.3	30.5	63.5	0	0	19.19	1.11	380	0.117
GZ30	543029.67178	5962819.412801	4.5	0	62	1	0	2	30	104.2	75.8	3	12	0	63	12.3	52.8	0	0	19.43	1.51	321.8	0.078
GZ32	542955.192646	5962926.981085	23	1	73	1	0	2	60	111.8	72.7	0	0	0	56	34	45	0	0	16.56	1.91	340.1	0.078
GZ34	542930.871392	5962867.905787	7.5	0	4	2	0	0	55	51.6	58.4	0	0	0	8	19	37	0	0	16.64	1.91	346.1	0.085
GZ35	542952.823624	5962912.553446	8.5	0	3	2	0	0	45	65.5	38	0	0	0	16	20	36	0	0	16.72	1.91	334.8	0.078
GZ36	542883.375915	5962929.139248	7.5	0	4	2	0	0	50	48.7	67.3	0	0	0	25	27.5	46.8	0	0	14.09	1.67	400.8	0.101
GZ37	542846.128556	5962957.195572	9.5	0	6	2	0	0	65	73.2	49.8	0	0	0	45.5	23	39.5	0	0	10.99	1.35	451.2	0.101
GZ38	542946.771893	5962997.861151	23	1	3	2	0	0	40	93.6	47.4	0	0	0	62.7	21.8	57	0	0	13.7	1.51	362.9	0.078
GZ39	543007.091228	5962976.465087	23	1	5	2	0	0	30	57.5	95.5	0	0	0	76.8	22	101.2	0	0	17.04	1.35	400	0.117
GZ41	543121.697193	5962847.729573	23	1	2	2	0	0	60	127.6	22.4	0	0	0	12.5	31	38.4	0	0	19.18	0.64	370.7	0.117
GZ43	542861.336178	5963089.177512	23	1	10	2	2	2	75	126.5	9.5	0	0	0	14.5	42.8	12.7	0	0	10.51	0.48	503.6	0.089
GZ45	543183.624326	5963026.1482	23	1	10	2	0	0	30	86.8	43.2	0	0	0	62.7	26.3	37.7	0	0	7.48	0.16	834.9	0.129
GZ46	537900.496315	5963625.447211	23	1	16	2	0	0	50	95	61	18.5	0	0	26.1	42	79.2	13.22	2.15	10.82	0.24	485.7	0.123
GZ47	537802.456663	5965682.456337	5.5	0	18	2	0	0	50	87.2	42.8	0	0	0	2.2	15.8	32.8	5.02	2.95	7.8	0.56	576.8	0.037
GZ49	542880.048561	5963934.016814	23	1	17	2	0	0	45	117.8	22.2	0	25	31	6	37.3	30.5	0	0	14.88	2.47	855.6	0.188
GZ51	543267.615347	5962860.297129	23	1	19	2	0	2	40	114.5	30.5	0	0	0	12.5	25	31.5	0	0	6.84	0.16	586.5	0.117
GZ52	542802.921745	5963028.434318	23	1	21	2	0	0	50	117.4	48.6	17.4	0	0	8.7	38	46.1	0	0	7.16	0.4	670.5	0.113
GZ53	543063.428156	5962906.74684	23	1	18	2	0	0	50	100.7	46.3	0	0	0	5.6	33	50	0	0	20.14	0.96	374.3	0.117
GZ54	545855.124124	5968122.171035	23	1	19	2	0	0	40	95.5	58.5	1	0	0	2	42	49.9	0	1.27	22.06	12.02	344.1	0.219
GZ55	545969.179286	5968203.438081	10.5	0	21	2	0	0	65	93.9	60.1	23	0	0	26	19	62	0	0.96	18.55	4.06	517.2	0.255
GZ56	542944.015515	5962855.962156	23	1	27	2	0	2	45	125.5	22.5	22	0	0	11	32.5	31.5	0	0	17.28	1.59	332.1	0.078
GZ57	543165.675047	5967289.214619	8	0	27	2	0	2	60	95.7	24.3	0	0	0	46.2	22.3	28.4	28.82	0	12.74	5.65	674	0.252
GZ61	543165.763122	5967317.66479	23	1	41	2	6	1	65	109.8	21.2	0	0	2.6	23	33.8	17.8	25.64	0	13.53	7.17	644.6	0.252
GZ62	542970.513607	5962869.665365	7.5	0	45	2	0	2	45	115.4	28.6	0	0	0	35.3	16.5	34.3	0	0	18.24	1.51	336.1	0.078
GZ63	542950.467835	5962969.815841	8.5	0	44	2	0	2	35	88.3	64.7	0	7	0	41	26.3	46	0	0	16	1.83	350.3	0.078
GZ64	545884.30216	5968044.253886	23	1	48	2	0	2	35	125.8	26.2	60.9	0	0	7.8	40.3	30.6	0	1.83	20.47	11.46	345.7	0.212
GZ67	542982.390212	5962999.447316	23	1	56	2	2	2	50	98.2	37.3	0	40.8	0	40.8	43.8	36.4	0	0	15.53	1.04	392.9	0.117
GZ68	543155.902345	5962805.101931	23	1	37	2	2	2	45	91.1	35.6	0	49.3	0	43.7	40.8	31.8	0	0	14.97	0.56	397.3	0.117
GZ69	543018.395757	5962781.111898	5.5	0	58	2	0	2	35	106.3	47.7	16.1	0	0	37.1	14	11.7	0	0	18.24	1.51	338.2	0.078
GZ70	543166.27872	5963061.4135	11	0	65	2	2	2	60	110.7	26.8	0	43.4	0	45.3	21.3	25.1	0	0	6.29	0.16	912.7	0.129
GZ74	540223.117212	5966611.624422	23	1	4	3	0	0	50	141.2	26.1111	18.3	1.7	0	10	37	28.3	0	2.95	8.76	0	663.1	0.043
GZ75	543234.394333	5962903.53613	22	0	10	3	2	2	50	105.5	18.8889	0	4.1	0	77.6	19	23.5	0	0	9.07	0.48	561.1	0.117
GZ77	543122.802905	5962880.571095	23	1	5	3	0	2	40	128.3	19.8889	0	0	0	49	25	28.7	0	0	19.35	0.56	374.6	0.117
GZ78	545969.080703	5968025.124728	23	1	15	3	7	2	50	133.1	23.1111	0	0	0	0	31.8	29.9	0	1.99	17.43	11.23	381.3	0.225
GZ79	541531.611251	5965937.084621	5.5	0	21	3	2	2	30	66	40.8889	0	15	0	58	18.5	47.5	0.88	0	13.94	1.43	630.1	0.237
GZ81	537838.979696	5963632.939412	23	1	23	3	0	2	50	143.4	25.5556	16.4	0	0	24.7	37	24.5	6.85	0	10.9	0.16	512.9	0.123
GZ82	537873.706003	5965711.972847	10	0	25	3	2	2	35	95.7	36.4444	0	11.6	0	13	20	29.2	7.48	2.79	7.8	0.64	579	0.042
GZ83	546182.626318	5966055.088517	19	0	25	3	4	2	25	90.7	23.4444	0	0	0	37.5	23.3	34.3	0	0	17.67	5.1	511.2	0.161
GZ85	547147.881177	5967237.02761	23	1	18	3	2	2	45	88.6	31.5556	0	30	8	12	35.8	45.8	0	0	10.35	2.07	527	0.268
GZ86	543116.703839	5963760.976017	23	1	14	3	2	2	45	75.7	35	0	50	21	29	35.5	30.9	0	0	11.62	3.98	833.6	0.305
GZ88	541533.108752	5965965.256149	20.5	0	32	3	0	2	45	117	51.1111	0	0	0	4	27.3	56.1	2.55	0	11.07	1.35	601.4	0.237
GZ91	548911.192766	5966975.819327	23	1	1	3	0	0	40	121.4	30.3333	0	0	0	31.9	20	42.1	13.46	0	17.52	0.16	324.3	0.38

## Sheet: water rail
Fixed factors							Nest factors					Territory factors						Landscape factors
Nest	XCOORD	YCOORD	Survival rate (days)	Nest fate	Initiation day	Year	Plant species	Vegetation stage	Vegetation cover (%)	Vegetation height (cm)	Water depth (cm)	Reed cover (%)	Sedges cover (%)	Willow cover (%)	Open water (%)	Vegetation density (%)	Water depth (cm)	Arable land (%)	Urbanised area (%)	Emergent vegetation (%)	Woody vegetation (%)	Water body shape (m/ha)	Water body fragmentation (ha/m)
GW1	543063.699281	5963802.401232	27	1	51	1	2	2	90	121.5	29.5	0	59.1	0	0	59	23.1	0	0	13.38	4.22	823.1	0.304
GW2	542896.056191	5963939.205446	18	0	57	1	2	2	80	87.9	26.6	0	38.9	1.1	7.4	39.3	3.7	0	0	13.3	2.55	939.8	0.275
GW5	545996.999654	5968059.792153	6.5	0	6	1	0	0	80	93.6	16.9	0	0	0	0	30.5	15.2	0	1.99	17.91	10.11	388.9	0.223
GW6	547364.74097	5969697.272657	10.5	0	2	1	4	0	45	82.6	10.4	0	0	0	0	30.3	19.7	44.43	0	5.97	0.08	696	0.054
GW7	548167.767757	5969307.440355	27	1	4	1	0	0	85	44	24.5	3	0	13	0	39	24.1	56.37	0	14.97	3.58	454.7	0.14
GW8	542788.284538	5963903.010381	9	0	7	1	2	0	80	39.8	27.7	0	0	0	0	38.3	15.6	0	0	17.36	3.26	700	0.149
GW11	548004.868224	5969313.61123	27	1	14	1	2	2	85	128.7	6.8	47	0	24	28	45	14.8	29.94	0	14.33	7.32	423.4	0.158
GW13	547361.249627	5969736.29798	27	1	16	1	4	2	65	90.9	6.6	0	0	0	0	33.5	17.9	38.93	0	5.33	0.08	602.4	0.027
GW14	545978.946559	5968059.190445	13	0	20	1	0	0	85	93	14	0	0	0	0	32	12.2	0	1.99	17.99	10.59	379.6	0.223
GW15	546647.82364	5967247.114411	27	1	13	1	0	0	60	119.6	16.4	30.3	0	0	0	53	22.7	0	8.92	20.38	0.64	555.9	0.492
GW16	545925.565253	5968135.484527	3	0	50	1	7	2	75	102.8	16.7	0	0	0	4.5	29.7	18.6	0	1.51	19.19	8.84	385.8	0.219
GW19	548174.177077	5969327.982108	27	1	7	2	1	0	60	171.8	15.2	59.6	0	12.1	0	51.8	16.3	56.13	0	14.74	3.34	464.2	0.14
GW20	548957.632159	5966941.782835	27	1	14	2	0	0	50	121.4	24.6	0	0	0	23.9	44.5	32.5	5.02	0	15.68	0.16	347.3	0.421
GW22	545027.097948	5969722.165806	27	1	20	2	0	0	55	99.4	14.6	0	0	0	0	55.5	13.6	22.37	0	12.58	0	887.4	0.194
GW23	540535.323741	5967434.146844	27	1	12	2	0	0	80	110.2	7.8	55.4	0	3.6	0	24	7	0	9.08	4.06	0.16	1510.6	0.037
GW24	543507.576357	5966671.530114	27	1	21	2	0	0	75	90.6	26.4	33.7	0	0	0	60.5	21	5.65	2.79	7.96	1.43	803.4	0.071
GW25	543221.317545	5967340.166044	18	0	32	2	0	0	70	139.2	13.8	8.5	0	14.9	0	32	12.9	37.82	0	11.62	5.02	643	0.225
GW26	543042.106785	5963879.838081	27	1	24	2	1	2	90	172.9	3.1	59.5	0	15.9	0	51.3	4.8	0	0	16.08	4.86	785.4	0.3
GW31	543246.050014	5967158.768995	27	1	44	2	0	2	70	88.9	7.1	0	0	0	0	45.3	4.6	42.52	0	8.36	0.32	549.2	0.052
GW32	543224.803477	5967306.332848	27	1	55	2	4	2	60	114.6	7.4	0	0	42	4	38.3	6.9	42.36	0	11.07	3.26	680.9	0.225
GW33	537957.797752	5965628.529473	25	1	59	2	2	1	60	125.2	43.8	0	0	11.1	12.5	42.8	28.7	15.29	0	7.56	0.64	508.7	0.036
GW34	543165.494191	5963807.029875	22	0	58	2	2	2	45	100.9	17.1	0	69.7	30.3	0	45.5	3.6	0	0	14.49	4.62	755.2	0.305
GW35	548140.978635	5969332.614372	4	0	69	2	2	2	85	65	17.5	18	0	12	0	25.8	10.1	51.19	0	14.57	3.18	447.4	0.14
GW36	545051.135903	5969752.959018	18	0	67	2	8	1	80	142.5	12	0	0	0	0	33	9.4	28.42	0	13.77	0.64	932.6	0.194
GW37	543013.775923	5963911.938277	26	1	64	2	2	2	55	88	16.5	0	51.4	33.2	0	60	9.3	0	0	16	4.54	814.7	0.3
GW38	540077.137578	5960975.675103	6	0	2	3	0	0	50	83.1	11.4	0	0	13.8	0	35.5	14	19.59	0	24.29	1.67	642.2	1.303
GW39	545265.358251	5970606.322874	11.5	0	7	3	7	0	60	58.4	19.1	0	0	0	0	51.8	15.2	59.95	0	23.41	0.72	555.9	0.248
GW40	545198.908279	5970675.174242	14	0	1	3	0	0	35	84.8	15.2	13.5	0	9.4	0	43.8	14.2	55.81	0	19.74	0.32	619	0.133
GW41	552068.759268	5964211.299423	24	0	1	3	2	2	90	78.5	0	0	66.3	33.7	0	80.5	0.1	7.25	0	8.52	1.67	680.5	0.012
GW43	546042.957975	5966537.389931	12	0	8	3	0	0	55	86.5	21.5	0	0	0	36.6	27.3	29.7	0.8	0	7.01	10.19	633.3	0.298
GW44	536748.759	5960821.877934	5	0	17	3	2	0	40	78.3	19.7	0	0	24	0	27	21.7	0	8.22	7.91	5.69	620.5	0.034
GW45	543016.542682	5971195.53334	15.5	0	14	3	0	2	40	115.8	54.2	0	16.5	0	15.4	16.5	54.4	0.8	3.58	8.59	1.04	753.7	0.191
GW46	547851.036833	5970489.713459	11	0	15	3	2	2	30	51.5	18.5	0	10.8	43.3	16.7	19.8	31.4	16.32	0	4.78	0.8	1229.3	0.03
GW47	545820.464145	5968292.54303	14.5	0	23	3	1	0	50	150.1	5.9	22.8	0	68.4	0	32.5	10.3	0	0	13.78	1.27	734.5	0.242
GW48	540234.821195	5961143.061359	5	0	20	3	0	0	55	74.5	27	17	0	0	7.4	34	30.8	6.29	0	35.43	8.28	487.5	1.219
GW49	543006.000069	5963709.677612	26	0	15	3	0	0	50	114.8	39.2	39.8	11.8	0	0	32.8	35.9	0	0	11.31	2.71	725.7	0.26
GW50	543640.726357	5966715.380745	27	1	22	3	0	0	80	131.1	21.9	0	0	0	0	56.8	11.7	4.78	0	11.62	1.04	872.3	0.113
GW51	543127.237774	5962843.813799	2	0	30	3	0	0	40	95.2	8.8	0	0	0	12.5	20	9.4	0	0	18.55	0.64	376.9	0.117
GW53	543314.776805	5967275.972396	5.5	0	30	3	0	2	50	140.3	18.7	0	0	0	37.5	25	18.4	55.25	0	9.24	0.32	683.5	0.225
GW54	537904.527339	5963807.111989	18	0	26	3	0	2	50	159.6	11.4	31.3	0	0	22.2	34.5	12.8	22.61	2.47	8.52	0	488.8	0.071
GW55	536784.145554	5960830.448472	26.5	0	20	3	2	2	70	126	5	0	26.8	20.7	0	47	0.5	0	9.71	7.88	5.81	615.9	0.034
GW56	547839.89496	5970508.623629	27	1	40	3	2	2	80	128.5	9.5	0	0	0	0	63	8.9	17.04	0	4.62	0.8	1202.4	0.028
GW57	537819.230095	5965739.635477	6	0	38	3	0	2	50	127.2	10.8	0	0	12.2	3	26.3	14.9	3.74	2.87	7.88	1.83	611.7	0.042
GW59	547165.409922	5967250.167855	19	0	38	3	2	2	60	106.3	24.7	0	23.6	33.5	0	38.5	15.1	0	0	10.35	2.07	549.2	0.268
GW61	537874.038222	5965714.149977	11.5	0	46	3	2	2	50	108	20.5	0	13.8	0	13.8	22.8	13.7	7.56	2.79	7.88	0.64	582.1	0.042
GW62	545976.955105	5966547.440581	27	1	43	3	3	2	50	137.4	12.6	0	0	0	30	28.8	9.1	10.91	0	3.9	10.27	569.8	0.289
GW63	545844.164822	5968156.446663	27	1	50	3	4	2	50	247.5	18.5	72.4	0	0	0	45.5	14.6	0	0.64	20.94	12.02	347.7	0.219
GW66	545893.98857	5968219.801562	3.5	0	66	3	0	2	50	146.7	20.3	1.7	0	0	0	30.5	21.1	0	0	19.19	4.38	476.5	0.242
GW67	545851.470517	5968081.765203	7	0	64	3	4	2	50	145	18	16	0	0	8	35.5	18.1	0	1.51	20.94	11.78	346.9	0.212
GW68	543025.685857	5962813.985274	17	0	71	3	2	2	60	157.2	5.8	16	10	0	46	31	23.1	0	0	19.43	1.43	322.2	0.078
