# Supplementary material for: The adaptive value of habitat preferences from a multi-scale spatial perspective: insights from marsh-nesting avian species
Source: PeerJ journal article supplement (doi:10.7717/peerj.3164), 2017-03-28
Supplement: Supplemental_Information_1.pdf [file Supplemental_Information_1.pdf]

**Table S1.** Descriptive statistics of environmental variables measured at successful and depredated nests of little crane (mean  $\pm$  se). For categorical variables (vegetation species, vegetation stage) the percentage of nests in each category is shown. In vegetation species only two most common species are included.

| Variable                                | Successful nests<br>( <i>n</i> = 32) | Depredated nests<br>( <i>n</i> = 19) |
|-----------------------------------------|--------------------------------------|--------------------------------------|
| <b>Landscape scale</b>                  |                                      |                                      |
| Arable land (%)                         | 1.85 $\pm$ 0.98                      | 5.01 $\pm$ 2.95                      |
| Urbanized area (%)                      | 0.32 $\pm$ 0.14                      | 0.35 $\pm$ 0.21                      |
| Emergent vegetation (%)                 | 14.77 $\pm$ 0.77                     | 15.43 $\pm$ 1.82                     |
| Woodie vegetation (%)                   | 2.28 $\pm$ 0.59                      | 2.01 $\pm$ 0.40                      |
| Water body shape (m/ha)                 | 468.1 $\pm$ 27.8                     | 484.6 $\pm$ 35.8                     |
| Water body fragmentation (ha/m)         | 0.141 $\pm$ 0.013                    | 0.145 $\pm$ 0.023                    |
| <b>Territory scale</b>                  |                                      |                                      |
| Reed cover (%)                          | 5.00 $\pm$ 2.17                      | 2.22 $\pm$ 1.43                      |
| Sedges cover (%)                        | 6.57 $\pm$ 2.64                      | 4.90 $\pm$ 2.42                      |
| Willow cover (%)                        | 1.96 $\pm$ 1.17                      | 0.00 $\pm$ 0.00                      |
| Open water(%)                           | 29.06 $\pm$ 3.89                     | 30.89 $\pm$ 5.14                     |
| Vegetation density (%)                  | 32.73 $\pm$ 1.26                     | 20.36 $\pm$ 1.00                     |
| Water depth (cm)                        | 43.93 $\pm$ 3.61                     | 37.41 $\pm$ 2.99                     |
| <b>Nest-site scale</b>                  |                                      |                                      |
| Vegetation species ( <i>Typha</i> spp.) | 78.1%                                | 68.4%                                |
| Vegetation species ( <i>Carex</i> spp.) | 15.6%                                | 26.3%                                |
| Vegetation stage (previous years)       | 34.4%                                | 31.6%                                |
| Vegetation stage (mixed) <sup>c</sup>   | 62.5%                                | 68.4%                                |
| Vegetation height (cm)                  | 107.3 $\pm$ 3.6                      | 90.5 $\pm$ 4.7                       |
| Vegetation cover (%)                    | 46.56 $\pm$ 1.87                     | 47.89 $\pm$ 3.27                     |
| Water depth (cm)                        | 42.83 $\pm$ 3.72                     | 42.70 $\pm$ 3.94                     |

**Table S2.** Descriptive statistics of environmental variables measured at successful and depredated nests of water rail (mean  $\pm$  se). For categorical variables (vegetation species, vegetation stage) the percentage of nests in each category is shown. In vegetation species only three most common species are included.

| Variable                                     | Successful nests<br>( <i>n</i> = 19) | Depredated nests<br>( <i>n</i> = 31) |
|----------------------------------------------|--------------------------------------|--------------------------------------|
| <b>Landscape scale</b>                       |                                      |                                      |
| Arable land (%)                              | 18.28 $\pm$ 4.59                     | 13.48 $\pm$ 3.63                     |
| Urbanized area (%)                           | 1.13 $\pm$ 0.65                      | 1.18 $\pm$ 0.42                      |
| Emergent vegetation (%)                      | 11.77 $\pm$ 1.21                     | 14.22 $\pm$ 1.21                     |
| Woodie vegetation (%)                        | 3.09 $\pm$ 0.81                      | 3.62 $\pm$ 0.64                      |
| Water body shape (m/ha)                      | 694.9 $\pm$ 67.7                     | 613.0 $\pm$ 34.9                     |
| Water body fragmentation (ha/m)              | 0.187 $\pm$ 0.031                    | 0.236 $\pm$ 0.052                    |
| <b>Territory scale</b>                       |                                      |                                      |
| Reed cover (%)                               | 18.99 $\pm$ 6.12                     | 5.95 $\pm$ 1.90                      |
| Sedges cover (%)                             | 3.68 $\pm$ 3.13                      | 10.61 $\pm$ 3.58                     |
| Willow cover (%)                             | 10.29 $\pm$ 4.35                     | 8.93 $\pm$ 2.75                      |
| Open water(%)                                | 5.18 $\pm$ 2.37                      | 7.45 $\pm$ 2.25                      |
| Vegetation density (%)                       | 47.24 $\pm$ 2.54                     | 33.84 $\pm$ 2.11                     |
| Water depth (cm)                             | 15.35 $\pm$ 1.88                     | 16.96 $\pm$ 1.98                     |
| <b>Nest-site scale</b>                       |                                      |                                      |
| Vegetation species ( <i>Typha</i> spp.)      | 42.1%                                | 45.2%                                |
| Vegetation species ( <i>Carex</i> spp.)      | 26.3%                                | 35.5                                 |
| Vegetation species ( <i>Juncus effusus</i> ) | 15.8%                                | 6.5%                                 |
| Vegetation stage (previous years)            | 42.1%                                | 45.3%                                |
| Vegetation stage (mixed) <sup>c</sup>        | 52.6%                                | 51.6%                                |
| Vegetation height (cm)                       | 122.7 $\pm$ 9.7                      | 104.4 $\pm$ 5.8                      |
| Vegetation cover (%)                         | 68.42 $\pm$ 3.25                     | 58.39 $\pm$ 2.97                     |
| Water depth (cm)                             | 16.46 $\pm$ 2.33                     | 17.69 $\pm$ 1.86                     |
